# Supplementary material for: Lnk controls mouse hematopoietic stem cell self-renewal and quiescence through direct interactions with JAK2
Source: JCI journal article supplement (doi:10.1172/jci35808), 2008-07-01
Supplement: sd1 [file 1]

# Lnk Controls Hematopoietic Stem Cell Self-renewal and Quiescence through Direct Interactions with JAK2

Alexey Bersenev<sup>2</sup>, Chao Wu<sup>2</sup>, Joanna Balcerek<sup>2</sup>, and Wei Tong<sup>1,2,3</sup>

## Supplemental Data:

**Figure 1S. Lnk controls survival under myelosuppressive stress through interaction with TPO/Mpl.** WT, Mpl<sup>-/-</sup>, Lnk<sup>-/-</sup> and Mpl<sup>-/-</sup>Lnk<sup>-/-</sup> mice were given weekly 5-FU injection, and the first 5-FU treatment was indicated as day 0. Percentages of mice survived after the first 5-FU injection is plotted. 5 – 8 mice per genotype was used in each experiment and representative of three independent experiments is shown here.

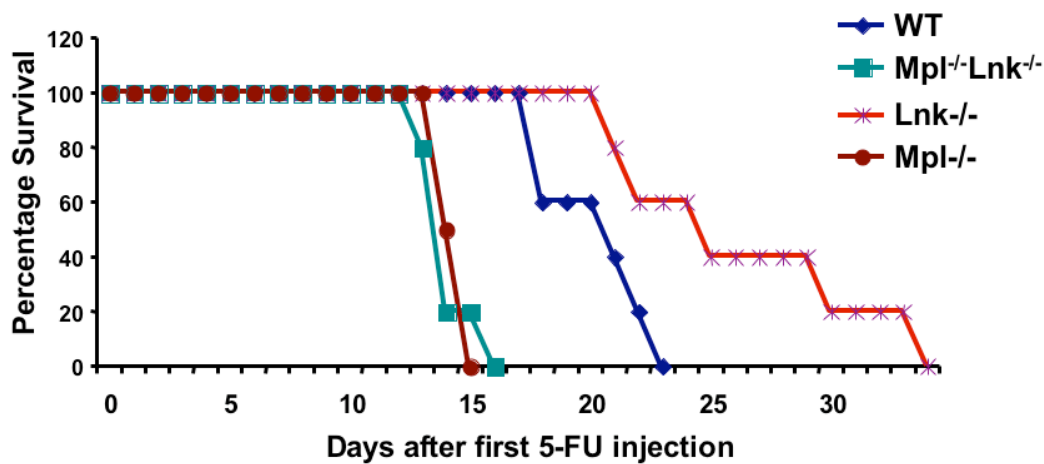

**Figure 2S: Flow cytometric sorting of HSCs from WT,  $Mpl^{-/-}$ ,  $Lnk^{-/-}$  and  $Mpl^{-/-}Lnk^{-/-}$  mice.**  
Representative plots are shown below for flow cytometric sorting of LSK HSCs from BM.

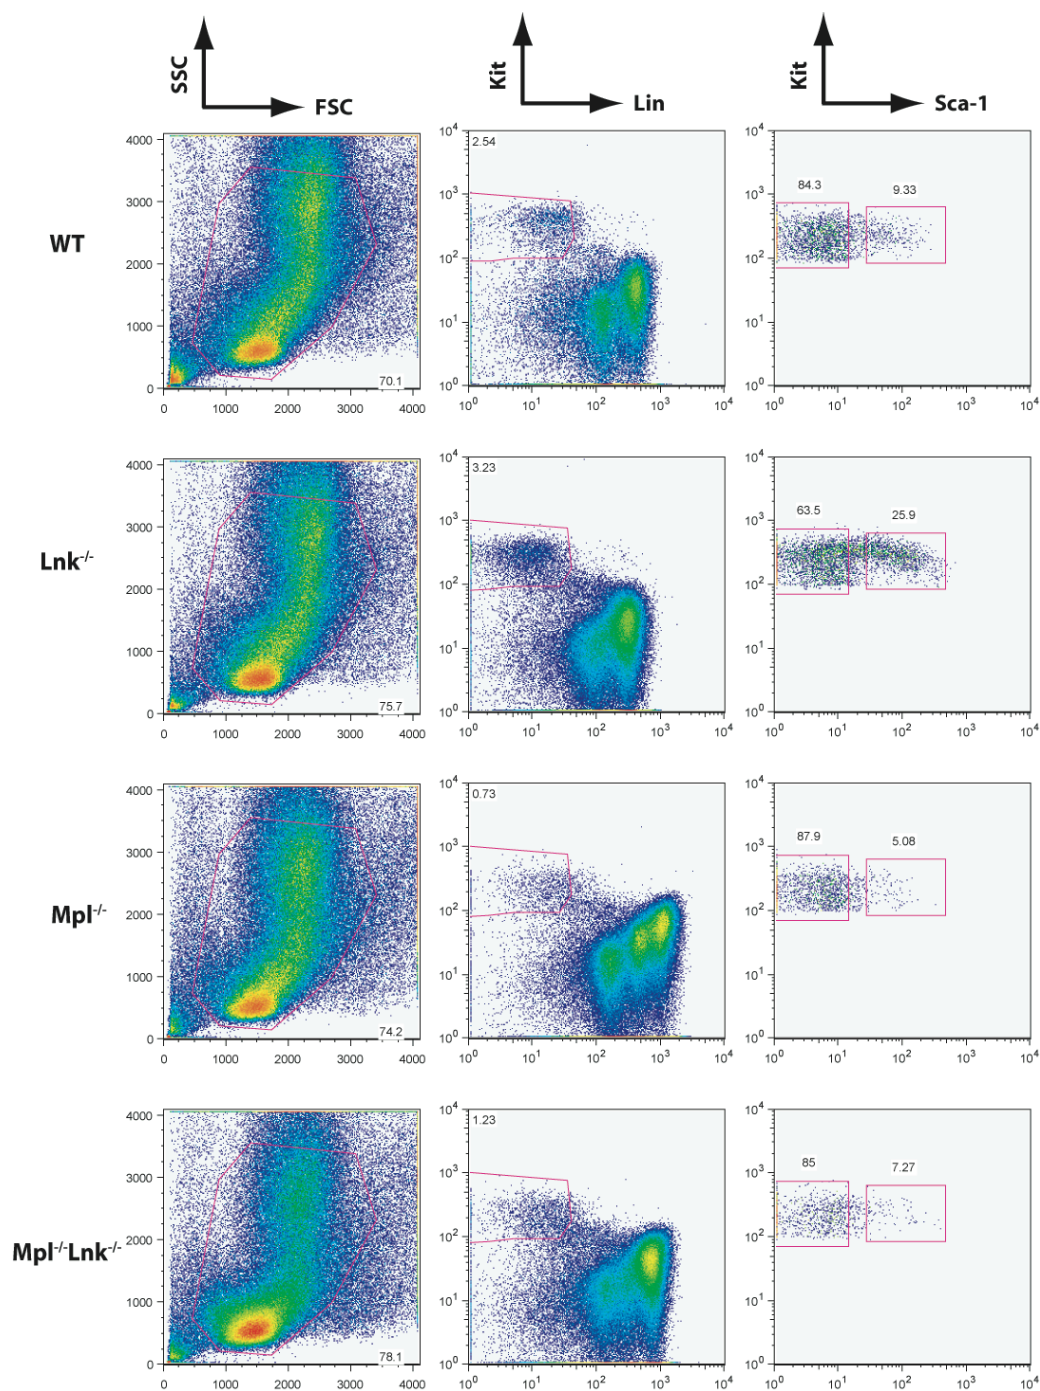

**Figure 3S: Cells expressing JAK2Y813F show increased sensitivity to TPO in supporting cell growth, and are less sensitive to Lnk growth inhibition.**

(a) Parental 32D cells and cells stably expressing Mpl in combination with wt JAK2, JAK2Y813F or JAK2 Y1007/8F mutant were established and cultured in IL-3 or different concentrations of TPO. Live cell numbers in the presence of TPO relative to that in IL-3 after three days' culture were determined by MTT (3-(4,5-dimethylthiazole-2-yl)-2, 5-diphenyl tetrazolium bromide) absorbance. Triplicates were plates in each condition and results shown are representative of two independent experiments. \*:  $p < 0.01$ . (b) 32D/Mpl cells expressing wt JAK2, JAK2Y813F or JAK2 Y1007/8F mutant were established. We introduced either vector alone (MIG) or MIG- Lnk into these cells and determined the proportion of infected cells as those that express GFP two days later (set as Day 0). We then cultured them in 1 ng/ml TPO, measured the GFP<sup>+</sup> fraction every day, and the percentage of GFP<sup>+</sup> cells relative to the infection rate (Day 0) was plotted. Results shown are representative of three independent experiments.

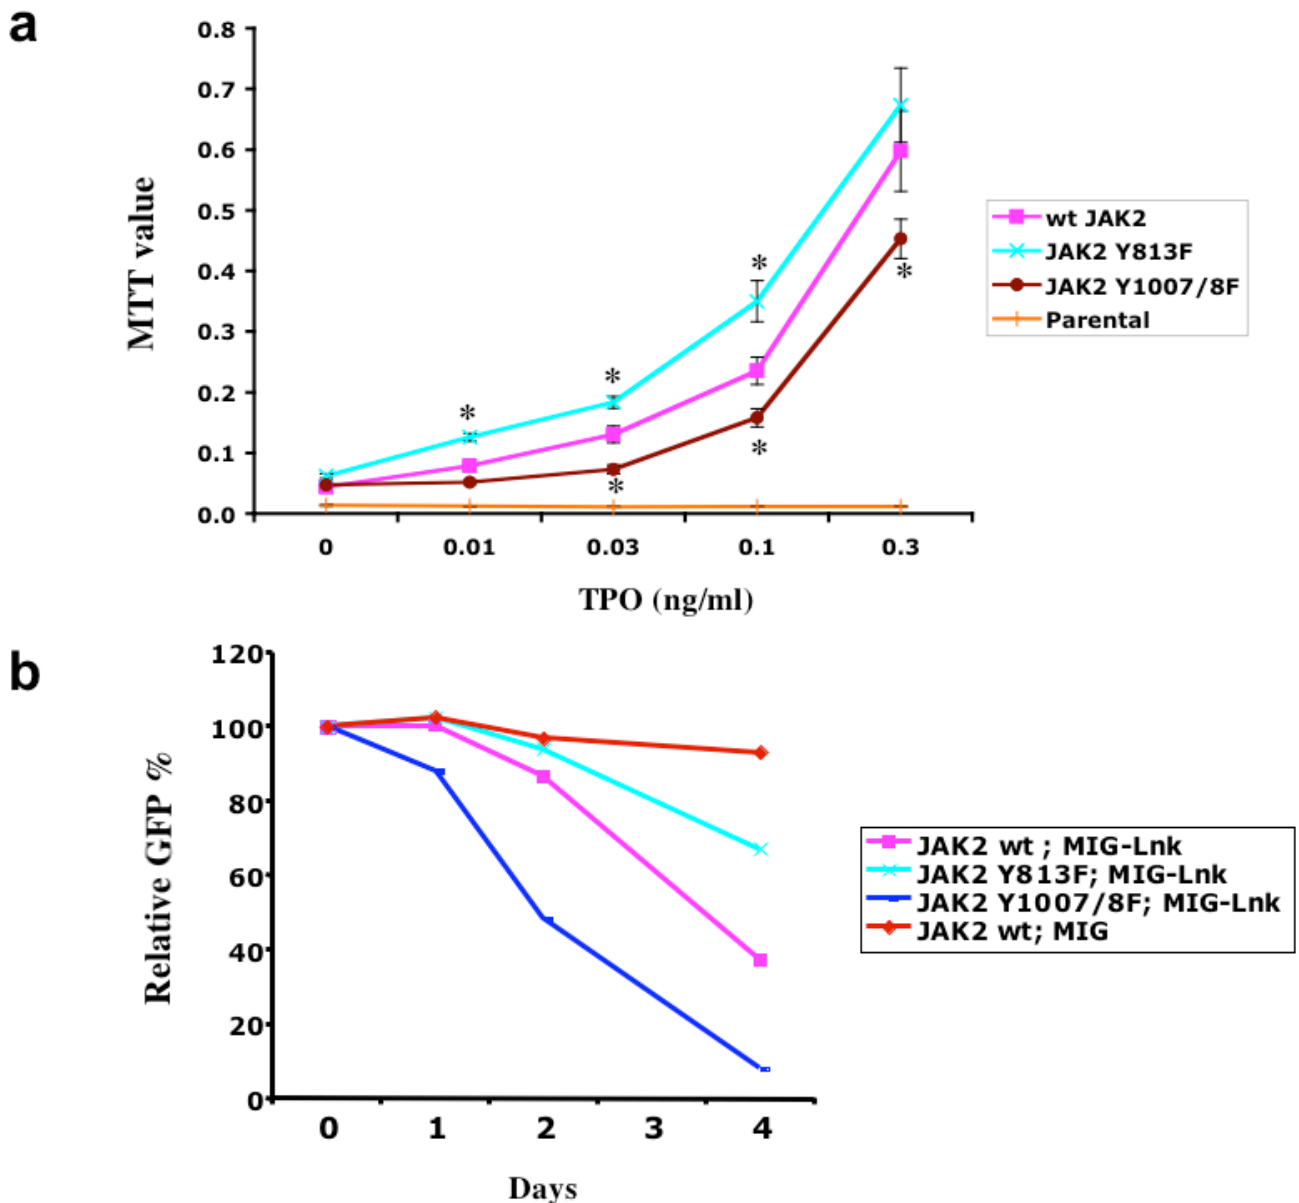

**Table 1 S : Summary of experimental parameters used to calculate HSC frequency by quantifying competitive repopulating unit (CRU).**

| Cell dose injected | Number Positive                        | Number Tested |
|--------------------|----------------------------------------|---------------|
| <b>WT</b>          |                                        |               |
| 1000               | 1                                      | 11            |
| 3000               | 2                                      | 9             |
| 10 000             | 9                                      | 24            |
| 30 000             | 12                                     | 15            |
| 100 000            | 7                                      | 7             |
| CRU frequency      | 1/18 570 (95% CI: 1/28 119 - 1/12 264) |               |

| Cell dose injected       | Number Positive                     | Number Tested |
|--------------------------|-------------------------------------|---------------|
| <b>Lnk<sup>-/-</sup></b> |                                     |               |
| 300                      | 1                                   | 8             |
| 1 000                    | 6                                   | 12            |
| 3 000                    | 9                                   | 12            |
| 10 000                   | 9                                   | 9             |
| 30 000                   | 7                                   | 7             |
| 100 000                  | 5                                   | 5             |
| CRU frequency            | 1/1 848 (95% CI: 1/3 064 - 1/1 115) |               |

| Cell dose injected       | Number Positive                        | Number Tested |
|--------------------------|----------------------------------------|---------------|
| <b>Mpl<sup>-/-</sup></b> |                                        |               |
| 10 000                   | 0                                      | 4             |
| 30 000                   | 2                                      | 8             |
| 100 000                  | 12                                     | 22            |
| 300 000                  | 11                                     | 11            |
| CRU frequency            | 1/109 380 (95% CI: 1/169 078-1/70 761) |               |

| Cell dose injected                        | Number Positive                      | Number Tested |
|-------------------------------------------|--------------------------------------|---------------|
| <b>Mpl<sup>-/-</sup>Lnk<sup>-/-</sup></b> |                                      |               |
| 3000                                      | 1                                    | 11            |
| 10 000                                    | 4                                    | 14            |
| 30 000                                    | 8                                    | 13            |
| 100 000                                   | 3                                    | 3             |
| CRU frequency                             | 1/29 970 (95% CI: 1/50 813-1/17 677) |               |

BM cells were isolated from WT, Lnk<sup>-/-</sup>, Mpl<sup>-/-</sup>, or Mpl<sup>-/-</sup>Lnk<sup>-/-</sup> mice, and different cell doses as indicated were mixed with 200,000 competitor BM cells and injected into lethally- irradiated recipient mice. Mice with over 1% donor-descent cells in the peripheral blood were counted as “positive reconstitution”, and CRU frequencies were calculated using L-Calc software (StemCell Technologies). The data are pooled from three independent experiments. 95% confident internal (CI) is indicated.

**Table 2 S : Summary of experimental parameters used to calculate HSC frequency after one and two times 5-FU treatments by quantifying competitive repopulating unit (CRU).**

| One time 5-FU treated | Cell dose injected       | Number Positive                        | Number Tested |
|-----------------------|--------------------------|----------------------------------------|---------------|
|                       | <b>WT</b>                |                                        |               |
|                       | 3 000                    | 0                                      | 6             |
|                       | 6 000                    | 0                                      | 4             |
|                       | 10 000                   | 2                                      | 11            |
|                       | 15 000                   | 4                                      | 6             |
|                       | 30 000                   | 7                                      | 7             |
|                       | 60 000                   | 3                                      | 3             |
|                       | 100 000                  | 5                                      | 5             |
|                       | CRU frequency            | 1/20 308 (95% CI: 1/33 216 - 1/12 417) |               |
|                       | <b>Lnk<sup>-/-</sup></b> |                                        |               |
|                       | 1 000                    | 1                                      | 10            |
|                       | 3 000                    | 6                                      | 11            |
|                       | 6 000                    | 7                                      | 9             |
|                       | 10 000                   | 8                                      | 8             |
|                       | 30 000                   | 5                                      | 5             |
|                       | 100 000                  | 4                                      | 4             |
|                       | CRU frequency            | 1/3 831 (95% CI: 1/6 063 - 1/2 421)    |               |

  

| Two times 5-FU treated | Cell dose injected       | Number Positive                         | Number Tested |
|------------------------|--------------------------|-----------------------------------------|---------------|
|                        | <b>WT</b>                |                                         |               |
|                        | 10 000                   | 0                                       | 4             |
|                        | 30 000                   | 0                                       | 5             |
|                        | 60 000                   | 1                                       | 4             |
|                        | 100 000                  | 9                                       | 12            |
|                        | 300 000                  | 9                                       | 9             |
|                        | 600 000                  | 6                                       | 6             |
|                        | 1 000 000                | 5                                       | 5             |
|                        | CRU frequency            | 1/94 477 (95% CI: 1/156 434 - 1/57 058) |               |
|                        | <b>Lnk<sup>-/-</sup></b> |                                         |               |
|                        | 1 000                    | 1                                       | 9             |
|                        | 3 000                    | 10                                      | 15            |
|                        | 6 000                    | 9                                       | 16            |
|                        | 10 000                   | 20                                      | 22            |
|                        | 30 000                   | 9                                       | 9             |
|                        | 1 000 000                | 9                                       | 9             |
|                        | CRU frequency            | 1/4 664 (95% CI: 1/6 569 - 1/3 311)     |               |

HSC frequencies of WT and Lnk<sup>-/-</sup> mice after one or two 5-FU treatments were determined by quantifying CRUs. WT or Lnk<sup>-/-</sup> mice administered intravenously with 150 mg/ml 5-FU two days before BMT, or given two 5-FU treatments four days apart and BM isolated the day after the second 5-FU injection. Limiting dilution assays were performed as described in Table 1S. The data are pooled from three independent experiments. 95% confident internal (CI) is indicated.
